# Supplementary material for: Clonidine Maintenance Prolongs Opioid Abstinence and Decouples Stress From Craving in Daily Life: A Randomized Controlled Trial With Ecological Momentary Assessment
Source: Atypon-hosted journal article supplement (doi:10.1176/appi.ajp.2014.14081014), 2015-03-18
Supplement: appi.ajp.2014.14081014.ds001.pdf [file appi.ajp.2014.14081014.ds001.pdf]

 


Psychiatry Online
